# Supplementary material for: Incubation Period of COVID-19 Caused by Unique SARS-CoV-2 Strains: A Systematic Review and Meta-analysis
Source: PubMed Central journal article supplement (PMC9396366; doi:10.1001/jamanetworkopen.2022.28008), 2022-08-22

## Supplemental Online Content

Wu Y, Kang L, Guo Z, Liu J, Liu M, Liang W. Incubation period of COVID-19 caused by unique SARS-CoV-2 strains. *JAMA Netw Open*. 2022;5(8):e2228008. doi:10.1001/jamanetworkopen.2022.28008

**eTable 1.** Search Strategies for Meta-analysis of Observational Studies Reporting the Incubation Period of COVID-19

**eTable 2.** Quality Assessment Scale

**eTable 3.** Quality Assessment of Final Studies Used in the Meta-analysis of Incubation Period

**eTable 4.** Characteristics of the Studies Included in the Systematic Review and Meta-analysis

**eFigure 1.** Funnel Plot with a 95% Confidence Interval for Included Studies in the Meta-analysis

**eFigure 2.** Forest Plot for the Meta-analysis of Incubation Period for COVID-19 Caused by Wild-type Strain

This supplemental material has been provided by the authors to give readers additional information about their work.

**eTable 1. Search Strategies for Meta-analysis of Observational Studies Reporting the Incubation Period of COVID-19**

| Database       | Search strategy                                                                                                                                                                                                                                                                                                                                                                                                                                                                                                                                                                  |
|----------------|----------------------------------------------------------------------------------------------------------------------------------------------------------------------------------------------------------------------------------------------------------------------------------------------------------------------------------------------------------------------------------------------------------------------------------------------------------------------------------------------------------------------------------------------------------------------------------|
| PubMed         | ("Coronavirus"[MeSH Terms] OR "Coronavirus Infections"[MeSH Terms] OR "COVID-19"[Supplementary Concept] OR "coronavir*"[Title/Abstract] OR "corona virus*"[Title/Abstract] OR "covid"[Title/Abstract] OR "nCoV"[Title/Abstract] OR "2019 novel*"[Title/Abstract] OR "2019nCoV"[Title/Abstract] OR "2019-CoV"[Title/Abstract] OR "nCoV2019"[Title/Abstract] OR "pneumonia virus*"[Title/Abstract] OR "Severe Acute Respiratory Syndrome"[Title/Abstract] OR "SARS"[Title/Abstract] OR "sarscov*"[Title/Abstract]) AND ("incubation period"[Text Word] OR "incubation"[Text Word]) |
| EMBASE         | ('covid 19'/exp OR 'coronavirus disease 2019'/exp OR 'severe acute respiratory syndrome coronavirus 2'/exp OR 'SARS-related coronavirus'/exp OR 'coronaviridae'/de OR 'coronavirinae'/exp OR 'coronavirus infection'/exp OR (coronavir* OR 'corona virus*' OR covid OR COVID19 OR nCoV OR '2019-novel*' OR 2019nCoV OR 2019 - CoV OR nCoV2019 OR 'pneumonia virus*' OR 'Severe Acute Respiratory Syndrome*' OR SARS OR SARSCoV*):ab,ti,kw) AND ('incubation period' OR incubation)                                                                                               |
| Web of science | TS = (((coronavir* OR "corona virus*" OR covid OR COVID19 OR nCoV OR "2019-novel Cov" OR 2019nCoV OR 2019 - CoV OR nCoV2019 OR "pneumonia virus*" OR "Severe Acute Respiratory Syndrome" OR SARS OR SARS-CoV-2)) AND (("incubation period" OR incubation)))                                                                                                                                                                                                                                                                                                                      |

**eTable 2. Quality Assessment Scale**

|                          |                                                                                                                                                                                                                                                                                                                                                                                                                                                                                                                                                                                                                                                                         |
|--------------------------|-------------------------------------------------------------------------------------------------------------------------------------------------------------------------------------------------------------------------------------------------------------------------------------------------------------------------------------------------------------------------------------------------------------------------------------------------------------------------------------------------------------------------------------------------------------------------------------------------------------------------------------------------------------------------|
| Part                     |                                                                                                                                                                                                                                                                                                                                                                                                                                                                                                                                                                                                                                                                         |
| <b>External validity</b> | <p>1) Representativeness of the study cohort</p> <p>a) No selection of cases based on age, sex or general health status, supported by descriptive statistics demonstrating comparability with overall population※</p> <p>b) No selection of cases based on age, sex or general health status, not supported by descriptive statistics※</p> <p>c) Cases are likely to be biased towards those with more severe COVID-19 symptoms due to selection process – e.g. records from hospitalised patients</p> <p>d) Cases are selected (e.g. based on age or sex) to represent a particular cohort of individuals</p> <p>e) No description of the derivation of the cohort</p> |
| <b>Internal validity</b> | <p><b>Exposure window</b></p> <p>2) Ascertainment of exposure</p> <p>a) original data collected through interview ※</p> <p>b) travel period only ※</p> <p>c) secondary data (using publicly available reports)</p> <p>3) Precision of the exposure window for cases used in final analysis</p> <p>a) only includes cases with a 1-day exposure window ※</p> <p>b) only includes cases with less than or equal to 3-day exposure window</p> <p>c) includes cases with a range of exposure windows but statistical methods are used to account for this</p> <p>d) includes cases with a range of exposure windows</p> <p>e) no description/not clear</p>                  |
|                          | <p><b>Outcome</b></p> <p>4) Assessment of outcome (onset of symptoms)</p> <p>a) original data collected through interview ※</p> <p>b) no description/not clear</p> <p>5) Precision of estimate of outcome</p> <p>a) Precise date ※</p> <p>b) Window</p> <p>c) no description/not clear</p>                                                                                                                                                                                                                                                                                                                                                                              |

**eTable 3. Quality Assessment of Final Studies Used in the Meta-analysis of Incubation Period**

| Author                                                     | Area        | Time period           | Quality assessment item category |   |   |   |   | Quality assessment |
|------------------------------------------------------------|-------------|-----------------------|----------------------------------|---|---|---|---|--------------------|
|                                                            |             |                       | 1                                | 2 | 3 | 4 | 5 |                    |
| Areekal et al <sup>16</sup> , 2021                         | India       | 2020.06-2020.07       | a                                | a | e | a | c | Moderate           |
| Backer et al <sup>18</sup> , 2020                          | China       | 2020.01.20-2020.01.28 | a                                | c | d | b | a | Moderate           |
| Backer et al <sup>17</sup> , 2020                          | Netherlands | 2021.12.13-2021.12.26 | a                                | a | c | a | a | Strong             |
| Bao et al <sup>19</sup> , 2020                             | China       | 2020.01.15-2020.02.06 | a                                | a | a | a | a | Strong             |
|                                                            |             |                       |                                  |   |   |   |   |                    |
| Brandal et al <sup>20</sup> , 2021                         | Norway      | 2021.11.26-2021.12.13 | a                                | a | a | a | a | Strong             |
| Bui et al <sup>21</sup> , 2020                             | Vietnam     | 2020.01.23-2020.04.13 | a                                | c | c | b | a | Moderate           |
| Chen et al <sup>22</sup> , 2020                            | China       | 2020.01.24-2020.02.13 | c                                | a | d | a | c | Moderate           |
| Covid-Epidemiology Investigation Team <sup>23</sup> , 2021 | China       | 2020.12.23-2021.01.31 | a                                | a | c | a | a | Strong             |
| Dai et al <sup>24</sup> , 2020                             | China       | 2020.01.20-2020.02.29 | a                                | b | d | a | a | Moderate           |
| Del Águila-Mejía et al <sup>26</sup> , 2022                | Spain       | 2021.11-2021.12       | a                                | a | a | a | a | Strong             |
| Deng et al <sup>27</sup> , 2021                            | China       | by 2020.03.09         | c                                | a | a | a | a | Strong             |
| Deng et al <sup>28</sup> , 2020                            | China       | by 2020.03.31         | a                                | c | e | a | a | Moderate           |
| Denis et al <sup>29</sup> , 2021                           | France      | 2020.12.15-2020.12.24 | a                                | a | e | a | c | Moderate           |
| Ding et al <sup>30</sup> , 2020                            | China       | 2020.01.21-2020.03.10 | a                                | a | a | a | a | Strong             |
| Dong et al <sup>31</sup> , 2020                            | China       | 2020.01.13-2020.02.21 | a                                | c | a | b | a | Moderate           |
| Du et al <sup>32</sup> , 2020                              | China       | 2020.01.08-2020.02.05 | a                                | c | d | b | b | Weak               |
| Gao et al <sup>34</sup> , 2020                             | China       | 2020.01.21-2020.02.11 | a                                | c | a | b | a | Moderate           |
| Gao et al <sup>33</sup> , 2020                             | China       | 2020.01.20-2020.03.17 | c                                | a | e | a | b | Moderate           |
| Grant et al <sup>35</sup> , 2022                           | France      | 2021.05.23-2021.08.13 | a                                | a | a | a | a | Strong             |
| Guo et al <sup>36</sup> , 2020                             | China       | 2020.01.15-2020.03.15 | c                                | c | a | b | a | Moderate           |
| Han et al <sup>37</sup> , 2020                             | South Korea | 2020.03.28-2020.04.08 | a                                | a | d | a | a | Strong             |
| Han et al <sup>39</sup> , 2020                             | China       | 2020.01.20-2020.03.10 | a                                | a | c | b | a | Moderate           |
| Han et al <sup>38</sup> , 2020                             | China       | 2020.01.31-2020.02.16 | c                                | a | e | a | a | Moderate           |
| Hong et al <sup>40</sup> , 2020                            | China       | 2020.01.14-2020.03.09 | a                                | c | a | b | a | Moderate           |
| Hua et al <sup>41</sup> , 2020                             | China       | 2020.01.01-2020.02.29 | d                                | a | b | b | a | Moderate           |
| Huang et al <sup>43</sup> , 2020                           | China       | 2020.01.08-2020.02.16 | a                                | c | c | b | c | Weak               |
| Huang et al <sup>42</sup> , 2020                           | China       | 2020.01.22-2020.06.18 | a                                | c | a | b | a | Moderate           |
| Huang et al <sup>44</sup> , 2021                           | China       | 2020.01.01-2020.04.08 | a                                | c | d | b | a | Moderate           |
| Je et al <sup>45</sup> , 2021                              | Australia   | 2020.02-2020.04       | a                                | c | d | b | a | Moderate           |
| Jeong et al <sup>46</sup> , 2020                           | South Korea | 2020.02.22-2020.02.26 | c                                | a | a | a | a | Strong             |
| Jiang et al <sup>47</sup> , 2020                           | China       | 2020.01.12-2020.02.20 | a                                | a | e | a | a | Strong             |
| Jiang et al <sup>48</sup> , 2021                           | China       | 2020.01.19-2020.01.23 | a                                | c | c | b | a | Moderate           |
| Jin et al <sup>49</sup> , 2020                             | China       | 2020.01.17-2020.02.08 | a                                | b | a | b | a | Moderate           |
| Khonyongwa et al <sup>50</sup> , 2020                      | UK          | 2020.03.01-2020.04.18 | c                                | a | c | a | a | Moderate           |
| Ki et al <sup>51</sup> , 2020                              | South Korea | 2020.03.01-2020.06.30 | a                                | c | d | b | b | Weak               |
| Kim et al <sup>52</sup> , 2020                             | South Korea | 2020.02.04-2020.04.07 | c                                | a | a | a | a | Strong             |

|                                          |             |                       |   |   |   |   |   |          |
|------------------------------------------|-------------|-----------------------|---|---|---|---|---|----------|
| Kong et al <sup>53</sup> , 2020          | China       | 2020.01.08-2020.01.27 | a | c | e | a | a | Moderate |
| Kong et al <sup>55</sup> , 2020          | China       | 2020.01.22-2020.02.15 | d | e | b | b | a | Weak     |
| Kong et al <sup>54</sup> , 2020          | China       | 2020.01.25-2020.02.20 | a | a | c | b | a | Moderate |
| Lai et al <sup>56</sup> , 2020           | China       | 2020.01.11-2020.02.10 | c | c | e | a | a | Moderate |
| Lau et al <sup>57</sup> , 2021           | China       | 2020.01.01-2020.01.29 | a | c | c | b | b | Weak     |
| Laval et al <sup>25</sup> , 2021         | France      | 2020.02.25-2020.03.04 | a | a | e | a | a | Strong   |
| Le et al <sup>58</sup> , 2020            | Vietnam     | 2020.01-2020.02       | a | a | c | a | a | Strong   |
| Lee et al <sup>59</sup> , 2021           | South Korea | 2021.11.24-2021.12.10 | a | a | d | a | a | Strong   |
| Lei et al <sup>60</sup> , 2020           | China       | 2020.01.22-2020.02.01 | d | a | d | a | a | Moderate |
| Leung et al <sup>61</sup> , 2020         | China       | 2020.01.20-2020.02.12 | a | c | d | b | a | Moderate |
| Li et al <sup>63</sup> , 2020            | China       | 2020.01.21-2020.02.09 | c | a | d | a | c | Moderate |
| Li et al <sup>64</sup> , 2022            | China       | 2021.05.21-2021.06.24 | a | c | a | b | a | Moderate |
| Li et al <sup>62</sup> , 2020            | China       | 2019.12-2020.01       | a | a | a | a | a | Strong   |
| Linton et al <sup>65</sup> , 2020        | China       | by 2020.01.31         | a | c | d | b | a | Moderate |
| Liu et al <sup>66</sup> , 2021           | China       | 2020.01.20-2020.02.23 | a | a | d | a | a | Strong   |
| Liu et al <sup>68</sup> , 2020           | China       | 2020.01.20-2020.04.15 | c | a | a | a | a | Strong   |
| Liu et al <sup>69</sup> , 2020           | China       | 2019.12.25-2020.02.05 | a | a | a | a | a | Strong   |
| Liu et al <sup>70</sup> , 2020           | China       | 2020.01.28-2020.04.12 | a | c | e | b | a | Moderate |
| Liu et al <sup>71</sup> , 2020           | China       | 2020.01.22-2020.02.21 | a | a | a | a | a | Moderate |
| Liu et al <sup>72</sup> , 2020           | China       | 2020.01.23-2020.02.10 | c | a | e | a | c | Strong   |
| Liu et al <sup>74</sup> , 2021           | China       | 2020.01.01-2020.03.30 | a | a | a | a | a | Strong   |
| Liu et al <sup>67</sup> , 2020           | China       | by 2020.02.11         | a | c | c | b | a | Moderate |
| Liu et al <sup>73</sup> , 2020           | China       | 2020.01.20-2020.03.17 | c | a | e | a | a | Moderate |
| Llaque-Quiroz et al <sup>75</sup> , 2020 | Peru        | 2020.03-2020.05       | d | a | e | a | a | Moderate |
| Mao et al <sup>76</sup> , 2020           | China       | by 2020.03.17         | a | c | a | b | a | Moderate |
| Moazzami et al <sup>77</sup> , 2021      | Iran        | 2020.04               | c | a | c | a | a | Moderate |
| Ng et al <sup>78</sup> , 2021            | China       | by 2020.03.21         | a | c | e | b | a | Moderate |
| Nie et al <sup>79</sup> , 2020           | China       | 2020.01.19-2020.02.08 | a | c | c | b | a | Moderate |
| Ogata et al <sup>80</sup> , 2022         | Japan       | 2020.07.01-2021.09.16 | a | a | a | a | a | Strong   |
| Pak et al <sup>81</sup> , 2020           | Global      | 2019.12.01-2020.03.30 | a | c | c | b | b | Weak     |
| Pan et al <sup>82</sup> , 2020           | China       | 2020.01-2020.02.20    | a | a | a | a | a | Strong   |
| Patrikar et al <sup>83</sup> , 2020      | India       | by 2020.05            | a | c | a | b | c | Moderate |
| Paul et al <sup>84</sup> , 2021          | Canada      | by 2020.11.07         | b | c | e | b | c | Weak     |
| Ping et al <sup>85</sup> , 2021          | China       | 2020.01.03-2020.03.05 | a | a | a | a | a | Strong   |
| Pongpirul et al <sup>86</sup> , 2020     | Thailand    | 2020.01.08-2020.04.16 | a | a | a | a | a | Strong   |
| Pung et al <sup>87</sup> , 2020          | Singapore   | 2020.02.03-2020.02.15 | a | a | e | a | c | Moderate |
| Qi et al <sup>88</sup> , 2020            | China       | 2020.01.13-2020.03.23 | c | a | c | a | b | Moderate |
| Qian et al <sup>89</sup> , 2020          | China       | 2020.01.20-2020.02.11 | a | a | e | a | c | Moderate |
| Qiu et al <sup>90</sup> , 2020           | China       | 2020.01.22-2020.02.12 | c | a | e | a | c | Moderate |
| Ratovoson et al <sup>91</sup> , 2021     | Madagascar  | 2020.03.09-2020.07.30 | a | a | c | a | a | Strong   |
| Ren et al <sup>92</sup> , 2020           | China       | by 2020.01.23         | a | c | d | b | a | Moderate |
| Samrah et al <sup>93</sup> , 2021        | Jordan      | 2020.03.15-2020.06.09 | c | b | a | a | a | Strong   |

|                                                        |             |                       |   |   |   |   |   |          |
|--------------------------------------------------------|-------------|-----------------------|---|---|---|---|---|----------|
| Sanche et al <sup>94</sup> , 2020                      | China       | 2020.01.15-2020.01.30 | a | c | a | b | a | Moderate |
| Shen et al <sup>95</sup> , 2020                        | China       | 2020.01.08-2020.02.19 | d | c | a | a | a | Moderate |
| Shen et al <sup>96</sup> , 2020                        | China       | 2020.01-2020.02       | a | b | b | a | b | Moderate |
| Shi et al <sup>97</sup> , 2020                         | China       | 2020.01.17-2020.03.05 | c | b | b | a | a | Moderate |
| Shi et al <sup>98</sup> , 2020                         | China       | 2020.01.18-2020.03.02 | a | a | c | a | a | Strong   |
| Shiel et al <sup>99</sup> , 2021                       | Australia   | 2020.01-2020.06       | a | c | a | a | a | Strong   |
| Shu et al <sup>100</sup> , 2020                        | China       | by 2020.02.28         | c | a | d | a | c | Moderate |
| Song et al <sup>101</sup> , 2020                       | China       | by 2020.01.26         | b | c | c | b | a | Moderate |
| Song et al <sup>102</sup> , 2020                       | China       | 2020.01.16-2020.01.29 | a | a | d | a | a | Strong   |
| Song et al <sup>103</sup> , 2020                       | China       | 2020.02-2020.03       | c | a | e | b | c | Weak     |
| Su et al <sup>104</sup> , 2021                         | China       | 2020.01.21-2020.04.18 | a | c | e | b | c | Weak     |
| Sugano et al <sup>105</sup> , 2020                     | Japan       | 2020.01.15-2020.03.19 | a | c | a | b | a | Moderate |
| Sun et al <sup>106</sup> , 2021                        | China       | 2020.12.23-2021.01.10 | a | a | e | b | c | Moderate |
| Sun et al <sup>107</sup> , 2020                        | China       | 2020.01.24-2020.02.16 | a | a | e | a | c | Moderate |
| Sun et al <sup>108</sup> , 2020                        | China       | 2020.01.20-2020.02.15 | c | a | e | a | a | Moderate |
| Sun et al <sup>109</sup> , 2021                        | China       | 2020.06-2020.07.10    | a | b | a | b | a | Strong   |
| Sun et al <sup>110</sup> , 2020                        | China       | 2020.02               | c | c | a | a | b | Moderate |
| Tan et al <sup>111</sup> , 2020                        | Singapore   | 2020.01.23-2020.04.02 | a | a | a | a | b | Strong   |
| Tanaka et al <sup>112</sup> , 2022                     | Japan       | 2022.01.01-2022.01.28 | a | a | c | a | a | Strong   |
| The SARS-CoV-2 variant with line <sup>113</sup> , 2021 | France      | 2020.12-2021.01       | a | a | e | a | a | Strong   |
| Tian et al <sup>114</sup> , 2020                       | China       | 2020.01.20-2020.02.10 | c | a | e | a | c | Moderate |
| Tindale et al <sup>115</sup> , 2020                    | China       | 2020.01.21-2020.02.22 | b | c | b | b | c | Weak     |
| Viego et al <sup>116</sup> , 2020                      | Argentina   | 2020.03.20-2020.05.08 | b | a | e | b | c | Moderate |
| Wang et al <sup>158</sup> , 2021                       | China       | by 2020.02.26         | a | a | a | a | a | Strong   |
| Wang et al <sup>117</sup> , 2020                       | China       | 2020.01.23-2020.02.20 | a | a | e | a | c | Moderate |
| Wang et al <sup>118</sup> , 2020                       | China       | 2020.01.01-2020.04.03 | a | a | e | a | c | Moderate |
| Wang et al <sup>119</sup> , 2020                       | China       | 2020.01.05-2020.02.12 | a | a | a | a | a | Strong   |
| Wang et al <sup>120</sup> , 2020                       | China       | 2020.01.20-2020.02.10 | c | a | e | a | c | Moderate |
| Wei et al <sup>123</sup> , 2021                        | China       | 2020.01.19-2020.03.01 | c | a | e | b | c | Weak     |
| Wei et al <sup>122</sup> , 2020                        | China       | 2020.01.27-2020.03.11 | c | a | a | a | c | Moderate |
| Won et al <sup>124</sup> , 2021                        | South Korea | 2020.01.20-2020.02.10 | b | c | e | b | a | Moderate |
| Wong et al <sup>125</sup> , 2020                       | Brunei      | 2020.03.09-2020.04.05 | a | a | a | a | a | Strong   |
| Wu et al <sup>128</sup> , 2021                         | China       | -                     | a | c | a | b | c | Moderate |
| Wu et al <sup>127</sup> , 2020                         | China       | 2020.01-2020.02       | c | a | e | a | c | Moderate |
| Wu et al <sup>126</sup> , 2020                         | China       | by 2020.02.18         | a | a | b | a | a | Strong   |
| Wu et al <sup>129</sup> , 2020                         | China       | 2020.01.23-2020.02.09 | a | a | e | a | c | Moderate |
| Xiao et al <sup>131</sup> , 2020                       | China       | 2020.01.19-2020.03.03 | c | a | c | a | c | Moderate |
| Xiao et al <sup>133</sup> , 2021                       | China       | by 2020.02.21         | a | c | d | b | a | Moderate |
| Xiao et al <sup>132</sup> , 2020                       | China       | by 2020.02.12         | a | c | c | b | a | Moderate |
| Xiao et al <sup>130</sup> , 2020                       | China       | 2020.01.24-2020.02.16 | d | c | e | b | c | Weak     |
| Xie et al <sup>134</sup> , 2020                        | China       | 2020.01.01-2020.02.15 | c | c | e | b | c | Weak     |
| Xin et al <sup>135</sup> , 2020                        | China       | 2020.07.10-2021.04.02 | a | c | c | b | a | Moderate |

|                                   |       |                       |   |   |   |   |   |          |
|-----------------------------------|-------|-----------------------|---|---|---|---|---|----------|
| Xu et al <sup>136</sup> , 2020    | China | 2020.01.23-2020.02.18 | a | a | e | a | c | Moderate |
| Xu et al <sup>137</sup> , 2020    | China | 2020.01.10-2020.01.26 | c | a | a | a | c | Moderate |
| Yang et al <sup>138</sup> , 2020  | China | 2020.01.01-2020.02.20 | a | c | a | b | a | Moderate |
| Yang et al <sup>139</sup> , 2021  | China | 2020.01.21-2020.02.25 | c | a | e | a | a | Moderate |
| Yang et al <sup>140</sup> , 2020  | China | 2020.01.25-2020.02.08 | a | a | a | a | a | Strong   |
| You et al <sup>141</sup> , 2020   | China | by 2020.03.31         | b | a | b | a | a | Strong   |
| Yu et al <sup>143</sup> , 2022    | China | 2020.01.01-2020.12.31 | a | c | e | b | c | Weak     |
| Yu et al <sup>142</sup> , 2020    | China | by 2020.02.19         | a | a | c | a | a | Strong   |
| Zhang et al <sup>146</sup> , 2021 | China | 2020.01.27-2020.02.13 | a | a | c | a | a | Strong   |
| Zhang et al <sup>144</sup> , 2020 | China | 2020.01.19-2020.02.17 | a | c | c | b | a | Moderate |
| Zhang et al <sup>145</sup> , 2020 | China | 2020.01.26-2020.02.20 | a | a | b | a | c | Moderate |
| Zhang et al <sup>147</sup> , 2021 | China | by 2020.03.11         | a | c | d | a | a | Moderate |
| Zhang et al <sup>148</sup> , 2021 | China | -                     | a | a | a | a | a | Strong   |
| Zhao et al <sup>151</sup> , 2021  | China | by 2020.04.08         | a | c | a | b | a | Moderate |
| Zhao et al <sup>152</sup> , 2020  | China | 2020.01.16-2020.02.17 | c | a | a | a | a | Strong   |
| Zhao et al <sup>153</sup> , 2021  | China | 2020.01.07-2020.05.17 | a | a | c | a | a | Strong   |
| Zhao et al <sup>150</sup> , 2021  | China | 2021.05.21-2021.06.18 | a | c | a | b | a | Moderate |
| Zhao et al <sup>149</sup> , 2020  | China | 2020.01.21-2020.02.22 | c | c | e | b | c | Weak     |
| Zhong et al <sup>154</sup> , 2020 | China | 2020.01.21-2020.02.10 | c | a | c | a | a | Moderate |
| Zhu et al <sup>156</sup> , 2021   | China | 2020.02.26-2020.04.04 | a | c | c | b | a | Moderate |
| Zhu et al <sup>155</sup> , 2020   | China | by 2020.03.26         | b | a | e | a | c | Moderate |
| Zhu et al <sup>157</sup> , 2021   | China | 2021.01.02-2021.02.14 | a | c | c | b | a | Moderate |

**eTable 4.** Characteristics of the Studies Included in the Systematic Review and Meta-analysis

| Author                                                     | Time period           | Type of design        | Method of assessing strain types                 | Virus strain      | Sample size |
|------------------------------------------------------------|-----------------------|-----------------------|--------------------------------------------------|-------------------|-------------|
| Areckal et al <sup>16</sup> , 2021                         | 2020.06-2020.07       | Cross-sectional study | PCR/Rapid Antigen Test                           | Wild-type strain  | 311         |
| Backer et al <sup>18</sup> , 2020                          | 2020.01.20-2020.01.28 | Cross-sectional study |                                                  | Wild-type strain  | 88          |
| Backer et al <sup>17</sup> , 2020                          | 2021.12.13-2021.12.26 | Cohort study          | PCR                                              | Multiple strains  | 258         |
| Bao et al <sup>19</sup> , 2020                             | 2020.01.15-2020.02.06 | Case series           | PCR                                              | Wild-type strain  | 57          |
| Brandal et al <sup>20</sup> , 2021                         | 2021.11.26-2021.12.13 | Case series           | PCR/WGS                                          | Omicron variant   | 81          |
| Bui et al <sup>21</sup> , 2020                             | 2020.01.23-2020.04.13 | Model study           |                                                  | Wild-type strain  | 19          |
| Chen et al <sup>22</sup> , 2020                            | 2020.01.24-2020.02.13 | Case series           |                                                  | Wild-type strain  | 18          |
| Covid-Epidemiology Investigation Team <sup>23</sup> , 2021 | 2020.12.23-2021.01.31 | Case series           | PCR/Sequence alignment and phylogenetic analyses | B.1.160.4 variant | 31          |
| Dai et al <sup>24</sup> , 2020                             | 2020.01.20-2020.02.29 | Model study           |                                                  | Wild-type strain  | 180         |
| Del Águila-Mejía et al <sup>26</sup> , 2022                | 2021.11-2021.12       | Cohort study          | PCR/WGS                                          | Multiple strains  | 333         |
| Deng et al <sup>27</sup> , 2021                            | by 2020.03.09         | Cohort study          | PCR                                              | Wild-type strain  | 43          |
| Deng et al <sup>28</sup> , 2020                            | by 2020.03.31         | Model study           |                                                  | Wild-type strain  | 198         |
| Denis et al <sup>29</sup> , 2021                           | 2020.12.15-2020.12.24 | Cross-sectional study | PCR/Rapid Antigen Test                           | Wild-type strain  | 1676        |
| Ding et al <sup>30</sup> , 2020                            | 2020.01.21-2020.03.10 | Cross-sectional study | PCR                                              | Wild-type strain  | 27          |
| Dong et al <sup>31</sup> , 2020                            | 2020.01.13-2020.02.21 | Cross-sectional study | PCR                                              | Wild-type strain  | 16          |
| Du et al <sup>32</sup> , 2020                              | 2020.01.08-2020.02.05 | Model study           |                                                  | Wild-type strain  | 109         |



|                                       |                       |                          |     |                  |      |
|---------------------------------------|-----------------------|--------------------------|-----|------------------|------|
| Gao et al <sup>34</sup> , 2020        | 2020.01.21-2020.02.11 | Cross-sectional study    |     | Wild-type strain | 24   |
| Gao et al <sup>33</sup> , 2020        | 2020.01.20-2020.03.17 | Cohort study             | PCR | Wild-type strain | 12   |
| Grant et al <sup>35</sup> , 2022      | 2021.05.23-2021.08.13 | Case control study       | PCR | Multiple strains | 7553 |
| Guo et al <sup>36</sup> , 2020        | 2020.01.15-2020.03.15 | Cross-sectional study    | PCR | Wild-type strain | 85   |
| Han et al <sup>37</sup> , 2020        | 2020.03.28-2020.04.08 | Case series              | PCR | Wild-type strain | 8    |
| Han et al <sup>39</sup> , 2020        | 2020.01.20-2020.03.10 | Cross-sectional study 研究 | PCR | Wild-type strain | 226  |
| Han et al <sup>38</sup> , 2020        | 2020.01.31-2020.02.16 | Cohort study             | PCR | Wild-type strain | 25   |
| Hong et al <sup>40</sup> , 2020       | 2020.01.14-2020.03.09 | Model study              |     | Wild-type strain | 58   |
| Hua et al <sup>41</sup> , 2020        | 2020.01.01-2020.02.29 | Cohort study             | PCR | Wild-type strain | 43   |
| Huang et al <sup>43</sup> , 2020      | 2020.01.08-2020.02.16 | Cross-sectional study 研究 |     | Wild-type strain | 734  |
| Huang et al <sup>42</sup> , 2020      | 2020.01.22-2020.06.18 | Cohort study             | PCR | Wild-type strain | 429  |
| Huang et al <sup>44</sup> , 2021      | 2020.01.01-2020.04.08 | Model study              |     | Wild-type strain | 787  |
| Je et al <sup>45</sup> , 2021         | 2020.02-2020.04       | Cohort study             | PCR | Wild-type strain | 29   |
| Jeong et al <sup>46</sup> , 2020      | 2020.02.22-2020.02.26 | Case series              | PCR | Wild-type strain | 25   |
| Jiang et al <sup>47</sup> , 2020      | 2020.01.12-2020.02.20 | Case series              | PCR | Wild-type strain | 43   |
| Jiang et al <sup>48</sup> , 2021      | 2020.01.19-2020.01.23 | Model study              |     | Wild-type strain | 147  |
| Jin et al <sup>49</sup> , 2020        | 2020.01.17-2020.02.08 | Cohort study             | PCR | Wild-type strain | 195  |
| Khonyongwa et al <sup>50</sup> , 2020 | 2020.03.01-2020.04.18 | Cross-sectional study    | PCR | Wild-type strain | 44   |
| Ki et al <sup>51</sup> , 2020         | 2020.03.01-2020.06.30 | Model study              |     | Wild-type strain | 79   |

|                                   |                       |                       |         |                  |     |
|-----------------------------------|-----------------------|-----------------------|---------|------------------|-----|
| Kim et al <sup>52</sup> , 2020    | 2020.02.04-2020.04.07 | Case series           | PCR     | Wild-type strain | 7   |
| Kong et al <sup>53</sup> , 2020   | 2020.01.08-2020.01.27 | Case series           |         | Wild-type strain | 10  |
| Kong et al <sup>55</sup> , 2020   | 2020.01.22-2020.02.15 | Cohort study          |         | Wild-type strain | 136 |
| Kong et al <sup>54</sup> , 2020   | 2020.01.25-2020.02.20 | Cohort study          | PCR/WGS | Wild-type strain | 411 |
| Lai et al <sup>56</sup> , 2020    | 2020.01.11-2020.02.10 | Cohort study          | PCR/WGS | Wild-type strain | 330 |
| Lau et al <sup>57</sup> , 2021    | 2020.01.01-2020.01.29 | Model study           |         | Wild-type strain | 160 |
| Laval et al <sup>25</sup> , 2021  | 2020.02.25-2020.03.04 | Case series           | PCR     | Wild-type strain | 23  |
| Le et al <sup>58</sup> , 2020     | 2020.01-2020.02       | Case series           | PCR/WGS | Wild-type strain | 11  |
| Lee et al <sup>59</sup> , 2021    | 2021.11.24-2021.12.10 | Case series           | PCR     | Omicron variant  | 80  |
| Lei et al <sup>60</sup> , 2020    | 2020.01.22-2020.02.01 | Case series           |         | Wild-type strain | 7   |
| Leung et al <sup>61</sup> , 2020  | 2020.01.20-2020.02.12 | Model study           |         | Wild-type strain | 90  |
| Li et al <sup>63</sup> , 2020     | 2020.01.21-2020.02.09 | Cohort study          | PCR     | Wild-type strain | 74  |
| Li et al <sup>64</sup> , 2022     | 2021.05.21-2021.06.24 | Cross-sectional study | PCR     | Delta variant    | 103 |
| Li et al <sup>62</sup> , 2020     | 2019.12-2020.01       | Cross-sectional study | PCR     | Wild-type strain | 10  |
| Linton et al <sup>65</sup> , 2020 | by 2020.01.31         | Model study           |         | Wild-type strain | 158 |
| Liu et al <sup>66</sup> , 2021    | 2020.01.20-2020.02.23 | Case series           | PCR     | Wild-type strain | 6   |
| Liu et al <sup>68</sup> , 2020    | 2020.01.20-2020.04.15 | Cohort study          |         | Wild-type strain | 49  |
| Liu et al <sup>69</sup> , 2020    | 2019.12.25-2020.02.05 | Cross-sectional study |         | Wild-type strain | 33  |
| Liu et al <sup>70</sup> , 2020    | 2020.01.28-2020.04.12 | Cross-sectional study |         | Wild-type strain | 27  |
| Liu et al <sup>71</sup> , 2020    | 2020.01.22-2020.02.21 | Cohort study          |         | Wild-type strain | 41  |

|                                          |                       |                       |                        |                  |        |
|------------------------------------------|-----------------------|-----------------------|------------------------|------------------|--------|
| Liu et al <sup>72</sup> , 2020           | 2020.01.23-2020.02.10 | Cross-sectional study |                        | Wild-type strain | 44     |
| Liu et al <sup>74</sup> , 2021           | 2020.01.01-2020.03.30 | Cross-sectional study | PCR/NGS                | Wild-type strain | 57     |
| Liu et al <sup>67</sup> , 2020           | by 2020.02.11         | Cross-sectional study | PCR/WGS                | Wild-type strain | 431    |
| Liu et al <sup>73</sup> , 2020           | 2020.01.20-2020.03.17 | Cohort study          | PCR                    | Wild-type strain | 90     |
| Llaque-Quiroz et al <sup>75</sup> , 2020 | 2020.03-2020.05       | Cross-sectional study | PCR/Rapid Antigen Test | Wild-type strain | 33     |
| Mao et al <sup>76</sup> , 2020           | by 2020.03.17         | Cross-sectional study | PCR                    | Wild-type strain | 28     |
| Moazzami et al <sup>77</sup> , 2021      | 2020.04               | Case series           |                        | Wild-type strain | 23     |
| Ng et al <sup>78</sup> , 2021            | by 2020.03.21         | Case series           |                        | Wild-type strain | 158    |
| Nie et al <sup>79</sup> , 2020           | 2020.01.19-2020.02.08 | Cross-sectional study |                        | Wild-type strain | 2907   |
| Ogata et al <sup>80</sup> , 2022         | 2020.07.01-2021.09.16 | Cohort study          | PCR/WGS                | Multiple strains | 121    |
| Pak et al <sup>81</sup> , 2020           | 2019.12.01-2020.03.30 | Model study           |                        | Wild-type strain | 207    |
| Pan et al <sup>82</sup> , 2020           | 2020.01-2020.02.20    | Cross-sectional study | PCR                    | Wild-type strain | 18     |
| Patrikar et al <sup>83</sup> , 2020      | by 2020.05            | Model study           |                        | Wild-type strain | 268    |
| Paul et al <sup>84</sup> , 2021          | by 2020.11.07         | Model study           |                        | Unknown strain   | 211735 |
| Ping et al <sup>85</sup> , 2021          | 2020.01.03-2020.03.05 | Cross-sectional study | PCR/WGS                | Wild-type strain | 90     |
| Pongpirul et al <sup>86</sup> , 2020     | 2020.01.08-2020.04.16 | Cross-sectional study | PCR                    | Wild-type strain | 83     |
| Pung et al <sup>87</sup> , 2020          | 2020.02.03-2020.02.15 | Cross-sectional study | PCR                    | Wild-type strain | 19     |

|                                      |                       |                       |         |                  |     |
|--------------------------------------|-----------------------|-----------------------|---------|------------------|-----|
| Qi et al <sup>88</sup> , 2020        | 2020.01.13-2020.03.23 | Case series           | PCR     | Wild-type strain | 56  |
| Qian et al <sup>89</sup> , 2020      | 2020.01.20-2020.02.11 | Case series           | PCR     | Wild-type strain | 91  |
| Qiu et al <sup>90</sup> , 2020       | 2020.01.22-2020.02.12 | Cross-sectional study |         | Wild-type strain | 104 |
| Ratovoson et al <sup>91</sup> , 2021 | 2020.03.09-2020.07.30 | Case series           | PCR     | Wild-type strain | 32  |
| Ren et al <sup>92</sup> , 2020       | by 2020.01.23         | Cross-sectional study |         | Wild-type strain | 98  |
| Samrah et al <sup>93</sup> , 2021    | 2020.03.15-2020.06.09 | Cohort study          | PCR     | Unknown strain   | 157 |
| Sanche et al <sup>94</sup> , 2020    | 2020.01.15-2020.01.30 | Model study           |         | Wild-type strain | 24  |
| Shen et al <sup>95</sup> , 2020      | 2020.01.08-2020.02.19 | Cross-sectional study |         | Wild-type strain | 6   |
| Shen et al <sup>96</sup> , 2020      | 2020.01-2020.02       | Case series           |         | Wild-type strain | 7   |
| Shi et al <sup>97</sup> , 2020       | 2020.01.17-2020.03.05 | Cross-sectional study |         | Wild-type strain | 38  |
| Shi et al <sup>98</sup> , 2020       | 2020.01.18-2020.03.02 | Cross-sectional study | PCR     | Wild-type strain | 46  |
| Shiel et al <sup>99</sup> , 2021     | 2020.01-2020.06       | Cross-sectional study | PCR     | Unknown strain   | 100 |
| Shu et al <sup>100</sup> , 2020      | by 2020.02.28         | Cross-sectional study | PCR/WGS | Wild-type strain | 32  |
| Song et al <sup>101</sup> , 2020     | by 2020.01.26         | Model study           |         | Wild-type strain | 90  |
| Song et al <sup>102</sup> , 2020     | 2020.01.16-2020.01.29 | Cross-sectional study | PCR     | Wild-type strain | 22  |
| Song et al <sup>103</sup> , 2020     | 2020.02-2020.03       | Cross-sectional study | PCR     | Wild-type strain | 17  |
| Su et al <sup>104</sup> , 2021       | 2020.01.21-2020.04.18 | Cross-sectional study | PCR     | Wild-type strain | 101 |

|                                                        |                       |                       |                 |                  |     |
|--------------------------------------------------------|-----------------------|-----------------------|-----------------|------------------|-----|
| Sugano et al <sup>105</sup> , 2020                     | 2020.01.15-2020.03.19 | Case series           | PCR             | Wild-type strain | 40  |
| Sun et al <sup>106</sup> , 2021                        | 2020.12.23-2021.01.10 | Case series           | PCR             | Unknown strain   | 19  |
| Sun et al <sup>107</sup> , 2020                        | 2020.01.24-2020.02.16 | Case series           | PCR             | Wild-type strain |     |
| Sun et al <sup>108</sup> , 2020                        | 2020.01.20-2020.02.15 | Case series           | PCR             | Wild-type strain | 55  |
| Sun et al <sup>109</sup> , 2021                        | 2020.06-2020.07.10    | Case series           | PCR/WGS         | B.1.1 variant    |     |
| Sun et al <sup>110</sup> , 2020                        | 2020.02               | Case series           | PCR             | Wild-type strain |     |
| Tan et al <sup>111</sup> , 2020                        | 2020.01.23-2020.04.02 | Cross-sectional study | PCR             | Wild-type strain | 164 |
| Tanaka et al <sup>112</sup> , 2022                     | 2022.01.01-2022.01.28 | Cross-sectional study | PCR/Time period | Multiple strains | 77  |
| The SARS-CoV-2 variant with line <sup>113</sup> , 2021 | 2020.12-2021.01       | Case series           | PCR/WGS         | Beta variant     | 10  |
| Tian et al <sup>114</sup> , 2020                       | 2020.01.20-2020.02.10 | Cohort study          | PCR             | Wild-type strain | 262 |
| Tindale et al <sup>115</sup> , 2020                    | 2020.01.21-2020.02.22 | Cross-sectional study |                 | Wild-type strain | 135 |
| Viego et al <sup>116</sup> , 2020                      | 2020.03.20-2020.05.08 | Cross-sectional study |                 | Unknown strain   | 15  |
| Wang et al <sup>158</sup> , 2021                       | by2020.02.26          | Case series           | PCR             | Wild-type strain | 14  |
| Wang et al <sup>117</sup> , 2020                       | 2020.01.23-2020.02.20 | Case series           | PCR             | Wild-type strain | 62  |
| Wang et al <sup>118</sup> , 2020                       | 2020.01.01-2020.04.03 | Cross-sectional study | PCR/NGS         | Wild-type strain | 219 |
| Wang et al <sup>119</sup> , 2020                       | 2020.01.05-2020.02.12 | Case series           | PCR/WGS         | Wild-type strain | 14  |
| Wang et al <sup>120</sup> , 2020                       | 2020.01.20-2020.02.10 | Case series           | PCR/WGS         | Wild-type strain | 275 |
| Wei et al <sup>123</sup> , 2021                        | 2020.01.19-2020.03.01 | Case series           |                 | Wild-type strain | 28  |
| Wei et al <sup>122</sup> , 2020                        | 2020.01.27-2020.03.11 | Case series           | PCR/NGS         | Wild-type strain | 71  |

|                                  |                       |                       |         |                  |      |
|----------------------------------|-----------------------|-----------------------|---------|------------------|------|
| Won et al <sup>124</sup> , 2021  | 2020.01.20-2020.02.10 | Model study           |         | Wild-type strain | 28   |
| Wong et al <sup>125</sup> , 2020 | 2020.03.09-2020.04.05 | Cross-sectional study | PCR     | Wild-type strain | 15   |
| Wu et al <sup>128</sup> , 2021   | -                     | Cross-sectional study | PCR/WGS | Unknown strain   | 39   |
| Wu et al <sup>127</sup> , 2020   | 2020.01-2020.02       | Case series           | PCR     | Wild-type strain | 14   |
| Wu et al <sup>126</sup> , 2020   | by 2020.02.18         | Case series           | PCR     | Wild-type strain | 19   |
| Wu et al <sup>129</sup> , 2020   | 2020.01.23-2020.02.09 | Case series           | PCR     | Wild-type strain | 41   |
| Xiao et al <sup>131</sup> , 2020 | 2020.01.19-2020.03.03 | Case series           | PCR     | Wild-type strain | 44   |
| Xiao et al <sup>133</sup> , 2021 | by 2020.02.21         | Cross-sectional study | PCR     | Wild-type strain | 217  |
| Xiao et al <sup>132</sup> , 2020 | by 2020.02.12         | Cross-sectional study |         | Wild-type strain | 2555 |
| Xiao et al <sup>130</sup> , 2020 | 2020.01.24-2020.02.16 | Cross-sectional study | PCR     | Wild-type strain | 279  |
| Xie et al <sup>134</sup> , 2020  | 2020.01.01-2020.02.15 | Case series           | PCR     | Wild-type strain | 21   |
| Xin et al <sup>135</sup> , 2020  | 2020.07.10-2021.04.02 | Model study           | PCR     | Unknown strain   | 177  |
| Xu et al <sup>136</sup> , 2020   | 2020.01.23-2020.02.18 | Case series           | PCR     | Wild-type strain | 19   |
| Xu et al <sup>137</sup> , 2020   | 2020.01.10-2020.01.26 | Case series           |         | Wild-type strain | 56   |
| Yang et al <sup>138</sup> , 2020 | 2020.01.01-2020.02.20 | Case series           |         | Wild-type strain | 325  |
| Yang et al <sup>139</sup> , 2021 | 2020.01.21-2020.02.25 | Case series           |         | Wild-type strain | 74   |
| Yang et al <sup>140</sup> , 2020 | 2020.01.25-2020.02.08 | Case series           | PCR     | Wild-type strain | 10   |
| You et al <sup>141</sup> , 2020  | by 2020.03.31         | Model study           |         | Wild-type strain | 169  |
| Yu et al <sup>143</sup> , 2022   | 2020.01.01-2020.12.31 | Model study           |         | Unknown strain   | 211  |

|                                   |                       |                       |         |                  |     |
|-----------------------------------|-----------------------|-----------------------|---------|------------------|-----|
| Yu et al <sup>142</sup> , 2020    | by 2020.02.19         | Cross-sectional study |         | Wild-type strain | 57  |
| Zhang et al <sup>146</sup> , 2021 | 2020.01.27-2020.02.13 | Case series           |         | Wild-type strain | 10  |
| Zhang et al <sup>144</sup> , 2020 | 2020.01.19-2020.02.17 | Cross-sectional study |         | Wild-type strain | 49  |
| Zhang et al <sup>145</sup> , 2020 | 2020.01.26-2020.02.20 | Cohort study          | PCR     | Wild-type strain | 6   |
| Zhang et al <sup>147</sup> , 2021 | by 2020.03.11         | Cross-sectional study |         | Wild-type strain | 139 |
| Zhang et al <sup>148</sup> , 2021 | -                     | Cross-sectional study |         | Unknown strain   | 353 |
| Zhao et al <sup>151</sup> , 2021  | by 2020.04.08         | Model study           |         | Wild-type strain | 254 |
| Zhao et al <sup>152</sup> , 2020  | 2020.01.16-2020.02.17 | Case series           |         | Wild-type strain | 45  |
| Zhao et al <sup>153</sup> , 2021  | 2020.01.07-2020.05.17 | Model study           |         | Unknown strain   | 102 |
| Zhao et al <sup>150</sup> , 2021  | 2021.05.21-2021.06.18 | Cross-sectional study | PCR/WGS | Delta variant    | 39  |
| Zhao et al <sup>149</sup> , 2020  | 2020.01.21-2020.02.22 | Case series           |         | Wild-type strain | 26  |
| Zhong et al <sup>154</sup> , 2020 | 2020.01.21-2020.02.10 | Case series           |         | Wild-type strain | 62  |
| Zhu et al <sup>156</sup> , 2021   | 2020.02.26-2020.04.04 | Cross-sectional study |         | Wild-type strain | 197 |
| Zhu et al <sup>155</sup> , 2020   | by 2020.03.26         | Cross-sectional study |         | Wild-type strain | 245 |
| Zhu et al <sup>157</sup> , 2021   | 2021.01.02-2021.02.14 | Model study           |         | Unknown strain   | 869 |

eFigure 1. Funnel Plot with a 95% Confidence Interval for Included Studies in the Meta-analysis

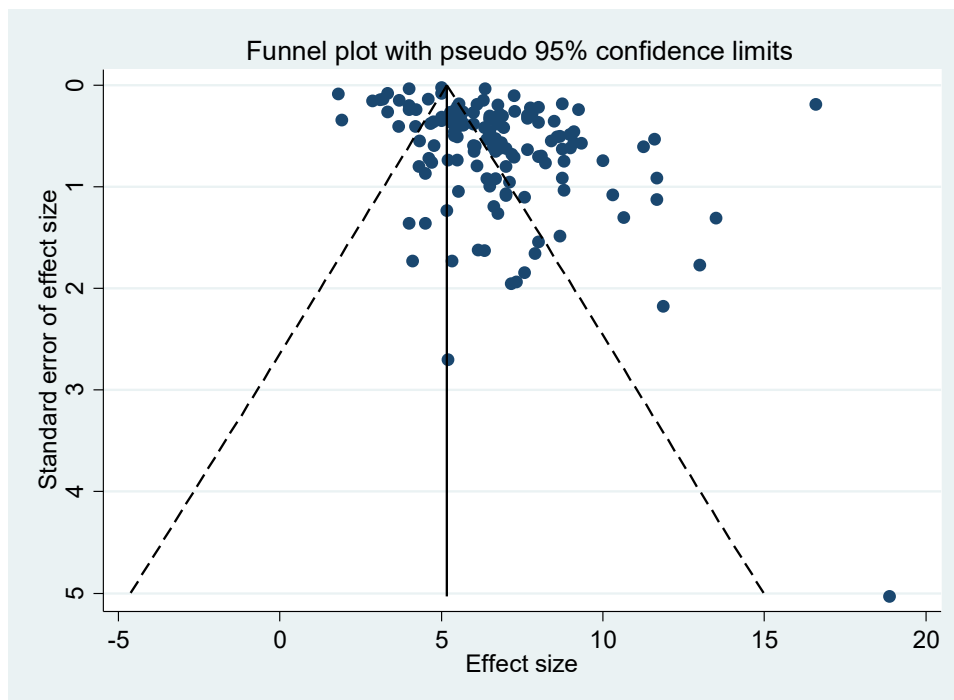



eFigure 2. Forest Plot for the Meta-analysis of Incubation Period for COVID-19 Caused by Wild-type Strain

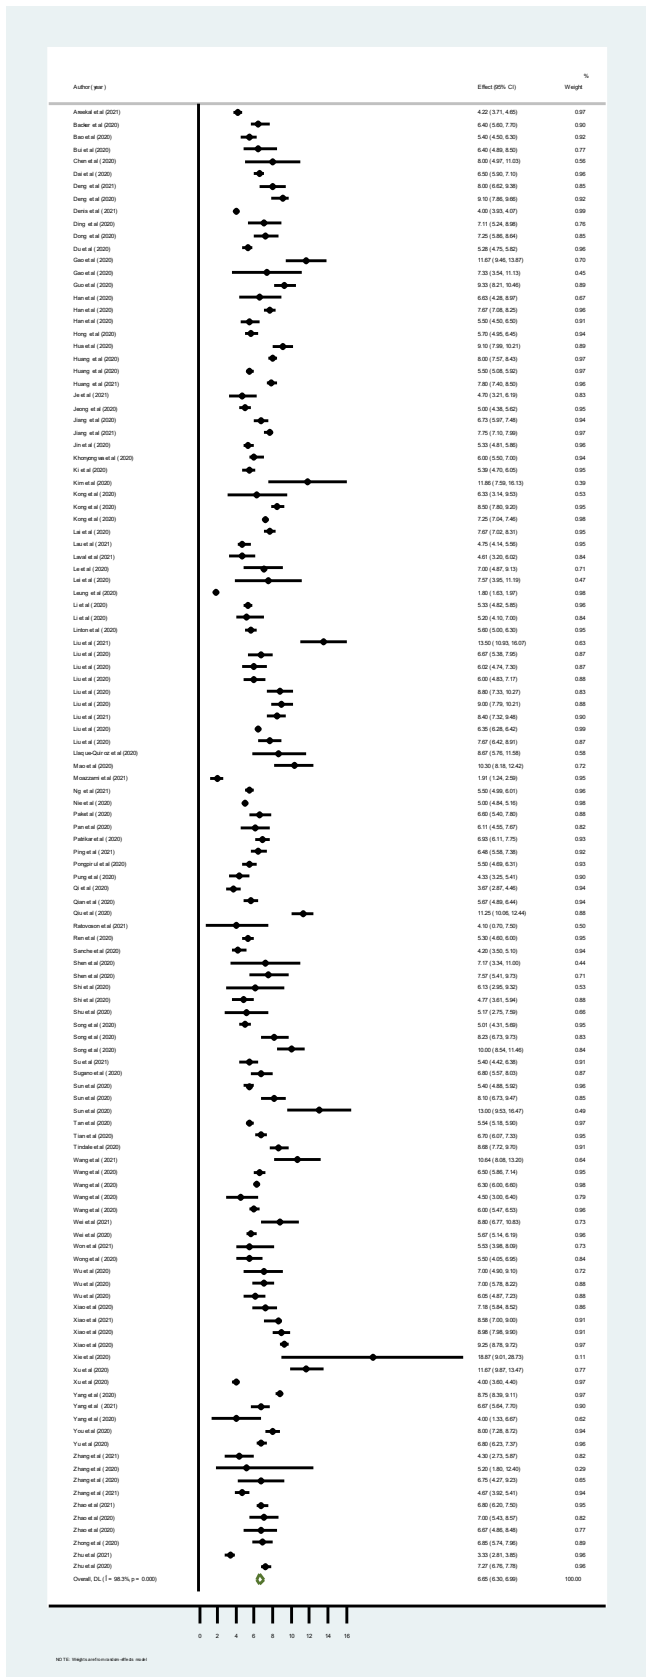

Supplement: jamanetwopen-e2228008-s001.pdf [file jamanetwopen-e2228008-s001.pdf]
